# Supplementary material for: Effect of Hookworm Infection on Wheat Challenge in Celiac Disease – A Randomised Double-Blinded Placebo Controlled Trial
Source: PLOS journal article supplement (doi:10.1371/journal.pone.0017366), 2011-03-08
Supplement: S1 (10.1371/journal.pone.0017366.s001) [file journal.pone.0017366.s001]

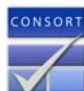

## CONSORT Statement 2001 Checklist

### Items to include when reporting a randomized trial

| <b>PAPER SECTION<br/>And topic</b>         | <b>Item</b> | <b>Descriptor</b>                                                                                                                                                                                                                                                                                                                                           | <b>Reported on<br/>Page #</b>     |
|--------------------------------------------|-------------|-------------------------------------------------------------------------------------------------------------------------------------------------------------------------------------------------------------------------------------------------------------------------------------------------------------------------------------------------------------|-----------------------------------|
| <i>TITLE &amp; ABSTRACT</i>                | 1           | <u>How participants were allocated to interventions</u> (e.g., "random allocation", "randomized", or "randomly assigned").                                                                                                                                                                                                                                  | Study design                      |
| <i>INTRODUCTION</i><br>Background          | 2           | <u>Scientific background and explanation of rationale.</u>                                                                                                                                                                                                                                                                                                  | Introduction                      |
| <i>METHODS</i><br>Participants             | 3           | <u>Eligibility criteria for participants</u> and the <u>settings and locations where the data were collected.</u>                                                                                                                                                                                                                                           | Methods                           |
| Interventions                              | 4           | <u>Precise details of the interventions intended for each group and how and when they were actually administered.</u>                                                                                                                                                                                                                                       | Study design                      |
| Objectives                                 | 5           | <u>Specific objectives and hypotheses.</u>                                                                                                                                                                                                                                                                                                                  | Introduction                      |
| Outcomes                                   | 6           | <u>Clearly defined primary and secondary outcome measures</u> and, when applicable, any <u>methods used to enhance the quality of measurements</u> (e.g., multiple observations, training of assessors).                                                                                                                                                    | Study design                      |
| Sample size                                | 7           | <u>How sample size was determined</u> and, when applicable, <u>explanation of any interim analyses and stopping rules.</u>                                                                                                                                                                                                                                  | Study design                      |
| Randomization --<br>Sequence generation    | 8           | <u>Method used to generate the random allocation sequence, including details of any restrictions</u> (e.g., blocking, stratification)                                                                                                                                                                                                                       | Study design                      |
| Randomization --<br>Allocation concealment | 9           | <u>Method used to implement the random allocation sequence</u> (e.g., numbered containers or central telephone), clarifying whether the sequence was concealed until interventions were assigned.                                                                                                                                                           | Inocula and inoculation           |
| Randomization --<br>Implementation         | 10          | <u>Who generated the allocation sequence, who enrolled participants, and who assigned participants to their groups.</u>                                                                                                                                                                                                                                     | Study design                      |
| Blinding (masking)                         | 11          | <u>Whether or not participants, those administering the interventions, and those assessing the outcomes were blinded to group assignment.</u> If done, <u>how the success of blinding was evaluated.</u>                                                                                                                                                    | Study design                      |
| Statistical methods                        | 12          | <u>Statistical methods used to compare groups for primary outcome(s); Methods for additional analyses</u> , such as subgroup analyses and adjusted analyses.                                                                                                                                                                                                | Statistical analysis              |
| <i>RESULTS</i><br>Participant flow         | 13          | <u>Flow of participants through each stage</u> (a diagram is strongly recommended). Specifically, for each group report the numbers of participants randomly assigned, receiving intended treatment, completing the study protocol, and analyzed for the primary outcome. <u>Describe protocol deviations from study as planned, together with reasons.</u> | Figure 2 and<br>Consort flowchart |
| Recruitment                                | 14          | <u>Dates defining the periods of recruitment and follow-up.</u>                                                                                                                                                                                                                                                                                             | Results                           |
| Baseline data                              | 15          | <u>Baseline demographic and clinical characteristics of each group.</u>                                                                                                                                                                                                                                                                                     | Table 1                           |
| Numbers analyzed                           | 16          | <u>Number of participants (denominator) in each group included in each analysis and whether the analysis was by "intention-to-treat".</u> State the results in absolute numbers when feasible (e.g., 10/20, not 50%).                                                                                                                                       | Study design                      |
| Outcomes and<br>estimation                 | 17          | <u>For each primary and secondary outcome, a summary of results for each group, and the estimated effect size and its precision</u> (e.g., 95% confidence interval).                                                                                                                                                                                        | Results                           |
| Ancillary analyses                         | 18          | <u>Address multiplicity by reporting any other analyses performed</u> , including subgroup analyses and adjusted analyses, indicating those pre-specified and those exploratory.                                                                                                                                                                            | Results                           |
| Adverse events                             | 19          | <u>All important adverse events or side effects in each intervention group.</u>                                                                                                                                                                                                                                                                             | Results                           |
| <i>DISCUSSION</i><br>Interpretation        | 20          | <u>Interpretation of the results</u> , taking into account study hypotheses, sources of potential bias or imprecision and the dangers associated with multiplicity of analyses and outcomes.                                                                                                                                                                | Discussion                        |
| Generalizability                           | 21          | <u>Generalizability (external validity) of the trial findings.</u>                                                                                                                                                                                                                                                                                          | Discussion                        |
| Overall evidence                           | 22          | <u>General interpretation of the results in the context of current evidence.</u>                                                                                                                                                                                                                                                                            | Discussion                        |

From Moher D, Schulz KF, Altman DG. The CONSORT statement: revised recommendations for improving the quality of reports of parallel-group randomised trials. Lancet 2001; 357(9263):1191-1194.

**The CONSORT Statement 2001 checklist is intended to be accompanied with the explanatory document that facilitates its use. For more information, visit [www.consort-statement.org](http://www.consort-statement.org).**
